# Supplementary material for: Associations of coke oven emission exposure with pulmonary function, blood pressure, blood cell parameters, and biochemical indices in coking workers: a cross-sectional pilot study
Source: Royal Society of Chemistry journal article supplement (doi:10.1039/d4em00306c), 2024-11-25
Supplement: d4em00306c3.pdf [file d4em00306c3.pdf]

## Appendix

### **Associations of coke oven emissions exposure with pulmonary function, blood pressure, and blood cell parameter, and biochemical indices in coking workers: a cross-sectional pilot study**

Min Sun <sup>acd‡</sup>, Xin Li <sup>b‡</sup>, Mengmeng Geng <sup>acd</sup>, Xiaoling Zhou <sup>acd</sup>, Zhiyan Zhang <sup>acd</sup>,  
Huixiang Nie <sup>b</sup>, Na Xia <sup>acd</sup>, Guoshun Huang <sup>e</sup>, Xuhong Wang <sup>e</sup>, Hongmei Zhang <sup>acd\*</sup>

<sup>a</sup> Department of Environmental Health, School of Public Health, Shanxi Medical University, Taiyuan 030001, Shanxi, China; <sup>b</sup> Radiological Health Department of TISCO General Hospital, Taiyuan 030003, Shanxi, China; <sup>c</sup> Center for Ecological Public Health Security of Yellow River Basin, Shanxi Medical University, 56 Xinjian South Road, Taiyuan 030001, China; <sup>d</sup> Key Laboratory of Coal Environmental Pathogenicity and Prevention Shanxi Medical University, Ministry of Education, Taiyuan, China; <sup>e</sup> Health Examination Department of TISCO General Hospital, Taiyuan 030003, Shanxi, China.

\*Corresponding author: Hongmei Zhang, PhD, Department of Environmental Health, Shanxi Medical University, 56 Xinjian South Road, Taiyuan 030001, China. E-mail: hm.zhang@sxmu.edu.cn.

‡These authors contributed equally to this work.

**TABLE S1** Conditions for the urinary phenol measurement using a gas chromatography

**TABLE S2** Correlation analysis of plasma  $\Sigma_{15}$ PAHs and 15 PAH homologs

**TABLE S3** Correlation analysis of coke oven emissions and health outcomes

**TABLE S4** Comparison of the sociodemographic characteristics between the Low PAHs group and High PAHs group <sup>a</sup> [Mean  $\pm$  SD or n (%)]

**FIGURE S1** Restricted cubic spline (RCS) regression of health outcomes with  $\Sigma_{15}$ PAHs and urinary phenol concentrations.

**TABLE S5** Comparison of the sociodemographic characteristics between the Low phenol group and High phenol group <sup>a</sup> [Mean  $\pm$  SD or n (%)]

**TABLE S1** Conditions for the urinary phenol measurement using a gas chromatography

| Item                                               | Parameters                                                                              |
|----------------------------------------------------|-----------------------------------------------------------------------------------------|
| Chromatographic column                             | Rtx-1701 capillary column (15 m×0.53 mm×1.00 μm)                                        |
| Split/split less sample injector (SPL)             | Temperature: -220.0 °C,<br>Injection method: Split injection, 1 min                     |
| Carrier gas                                        | Nitrogen/air                                                                            |
| Control mode                                       | Pressure (17.0 kPa)                                                                     |
| Column temperature                                 | 110.0 °C (balanced for 3 min)                                                           |
| Temperature of the flame ionization detector (FID) | -220.0 °C                                                                               |
| Signal acquisition                                 | Sampling speed: 40 msec<br>Stop time: 6 min, Dely time: 0 min                           |
| Make-up gas:                                       | Nitrogen/air (nitrogen: 50.0 mL/min, air: 400.0 mL/min,<br>tail flow rate: 30.0 mL/min) |

**TABLE S2** Correlation analysis of plasma  $\sum_{15}$ PAHs and 15 PAH homologs

|                  | PAHs homologs |        |        |        |        |        |        |        |
|------------------|---------------|--------|--------|--------|--------|--------|--------|--------|
|                  | Acy           | Ace    | Phe    | Flu    | Flt    | Ant    | Pyr    | BaA    |
| $\sum_{15}$ PAHs | 0.59**        | 0.42** | 0.75** | 0.78** | 0.7**  | 0.75** | 0.67** | 0.69** |
|                  | Chr           | BkF    | BbF    | BaP    | DhA    | InP    | BgP    |        |
|                  | 0.65**        | 0.68** | 0.40** | 0.35** | 0.35** | 0.083* | 0.031# |        |

Note: \*\*:  $P < 0.01$ ; \*:  $P < 0.05$ ; #:  $P < 0.10$

**TABLE S3** Correlation analysis of coke oven emissions and health outcomes

| Coke oven emissions    | Health outcomes |      |          |       |       |      |      |        |         |       |       |      |        |       |
|------------------------|-----------------|------|----------|-------|-------|------|------|--------|---------|-------|-------|------|--------|-------|
|                        | FVC             | FEV1 | FEV1/FVC | SBP   | DBP   | WBC  | RBC  | HGB    | PLT     | GLU   | TC    | TG   | HDL    | LDL   |
| $\sum_{15}\text{PAHs}$ | 0.04            | 0.05 | -0.01    | -0.07 | -0.02 | 0.08 | 0.06 | 0.14** | -0.01   | -0.03 | -0.04 | 0.01 | 0.03   | -0.06 |
| Phenol                 | 0.13*           | 0.01 | -0.09    | 0.05  | 0.08  | 0.02 | 0.10 | 0.12*  | -0.16** | -0.02 | 0.05  | 0.07 | -0.12* | -0.01 |

Abbreviation: FVC, forced vital capacity; FEV1, forced expiratory volume in 1 second; SBP, systolic blood pressure; DBP, diastolic blood pressure; WBC, white blood cell counts; RBC, red blood cell counts; HGB, hemoglobin; PLT, platelet; GLU, glucose; TC, total cholesterol; TG, triglyceride; HDL, high-density lipoprotein; LDL, low-density lipoprotein.

Note: \*\*:  $P < 0.01$ ; \*:  $P < 0.05$ .

**TABLE S4** Comparison of the sociodemographic characteristics between the Low PAHs group and High PAHs group <sup>a</sup> [Mean  $\pm$  SD or n (%)]

| Characteristics              | Low $\Sigma_{15}$ PAHs<br>(n = 283) | High $\Sigma_{15}$ PAHs<br>(n = 283) | $\chi^2/t$ | <i>P</i> |
|------------------------------|-------------------------------------|--------------------------------------|------------|----------|
| Gender (N (%))               |                                     |                                      | 8.36       | <0.01    |
| Male                         | 256 (90.46)                         | 273 (96.47)                          |            |          |
| Female                       | 27 (9.54)                           | 10 (3.53)                            |            |          |
| Educational level            |                                     |                                      | 7.78       | 0.02     |
| Junior high school and below | 88 (31.10)                          | 59 (20.85)                           |            |          |
| Senior high school           | 90 (31.80)                          | 101 (35.69)                          |            |          |
| College and above            | 105 (37.10)                         | 123 (43.46)                          |            |          |
| Age (yrs)                    | 45.75 $\pm$ 7.37                    | 43.23 $\pm$ 8.25                     | 3.83       | <0.01    |
| Employment duration (yrs)    | 26.64 $\pm$ 7.97                    | 23.66 $\pm$ 9.57                     | 4.03       | <0.01    |
| BMI (kg/m <sup>2</sup> )     | 25.41 $\pm$ 3.62                    | 24.91 $\pm$ 3.06                     | 1.79       | 0.07     |
| Tobacco smoking              |                                     |                                      | 0.35       | 0.61     |
| Non smoking                  | 118 (41.70)                         | 125 (44.17)                          |            |          |
| Smoking                      | 165 (58.30)                         | 158 (55.83)                          |            |          |
| Alcohol drinking             |                                     |                                      | 0.07       | 0.86     |
| Non drinking                 | 171 (60.42)                         | 174 (61.48)                          |            |          |
| Drinking                     | 112 (39.58)                         | 109 (38.52)                          |            |          |

Note: a: Subgroups based on the median of the plasma  $\Sigma_{15}$ PAHs concentrations median include low  $\Sigma_{15}$ PAHs group (<8.85 ng/mL) and high  $\Sigma_{15}$ PAHs group ( $\geq$  8.85 ng/mL).

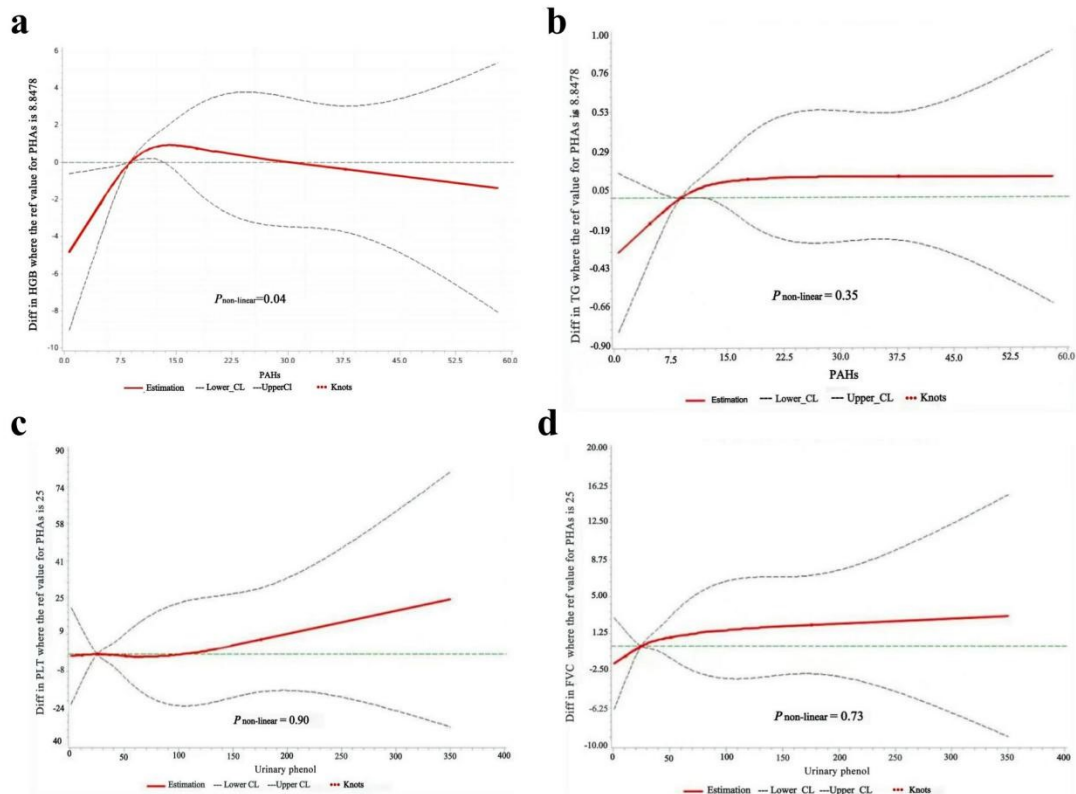

**FIGURE S1** Restricted cubic spline (RCS) regression of health outcomes with  $\sum_{15}$ PAHs and urinary phenol concentrations.

**Note:** Panel a~b: Restricted cubic splines regression (RCS) of HGB and TG with  $\sum_{15}$ PAHs concentrations, respectively; Panel c~d: Restricted cubic splines regression (RCS) of PLT and FVC with urinary phenol concentrations, respectively.

**TABLE S5** Comparison of the sociodemographic characteristics between the Low phenol group and High phenol group <sup>a</sup> [Mean  $\pm$  SD or n (%)]

| Characteristics              | Low phenol subgroup (n = 150) | High phenol subgroup (n = 283) | $\chi^2/t$ | <i>P</i> |
|------------------------------|-------------------------------|--------------------------------|------------|----------|
| Gender                       |                               |                                | 0.23       | 0.79     |
| Male                         | 142                           | 139                            |            |          |
| Female                       | 8                             | 6                              |            |          |
| Educational level            |                               |                                | 0.21       | 0.89     |
| Junior high school and below | 34 (22.67)                    | 30 (20.69)                     |            |          |
| Senior high school           | 50 (33.33)                    | 48 (33.10)                     |            |          |
| College and above            | 66 (44.00)                    | 67 (46.21)                     |            |          |
| Age (yrs)                    | 44.55 $\pm$ 7.40              | 42.05 $\pm$ 8.01               | 1.77       | <0.01    |
| Employment duration (yrs)    | 25.02 $\pm$ 8.65              | 22.62 $\pm$ 9.14               | 1.18       | 0.02     |
| BMI (kg/m <sup>2</sup> )     | 24.82 $\pm$ 3.05              | 25.17 $\pm$ 3.13               | 0.17       | 0.33     |
| Tobacco smoking              |                               |                                | 0.14       | 0.73     |
| Non smoking                  | 64 (42.67)                    | 65 (44.83)                     |            |          |
| Smoking                      | 86 (57.33)                    | 80 (55.17)                     |            |          |
| Alcohol consumption          |                               |                                | 0.93       | 0.34     |
| Non consumption              | 88 (58.67)                    | 93 (64.14)                     |            |          |
| consumption                  | 62 (41.33)                    | 52 (35.86)                     |            |          |

Note: a: Subgroups based on the median of the urinary phenol concentrations median include low phenol group (< 6 $\mu$ g/mL) and high phenol group ( $\geq$ 6  $\mu$ g/mL)
