# Supplementary figures and images for: Associations of coke oven emission exposure with pulmonary function, blood pressure, blood cell parameters, and biochemical indices in coking workers: a cross-sectional pilot study
Source: Royal Society of Chemistry journal article supplement (doi:10.1039/d4em00306c), 2024-11-25

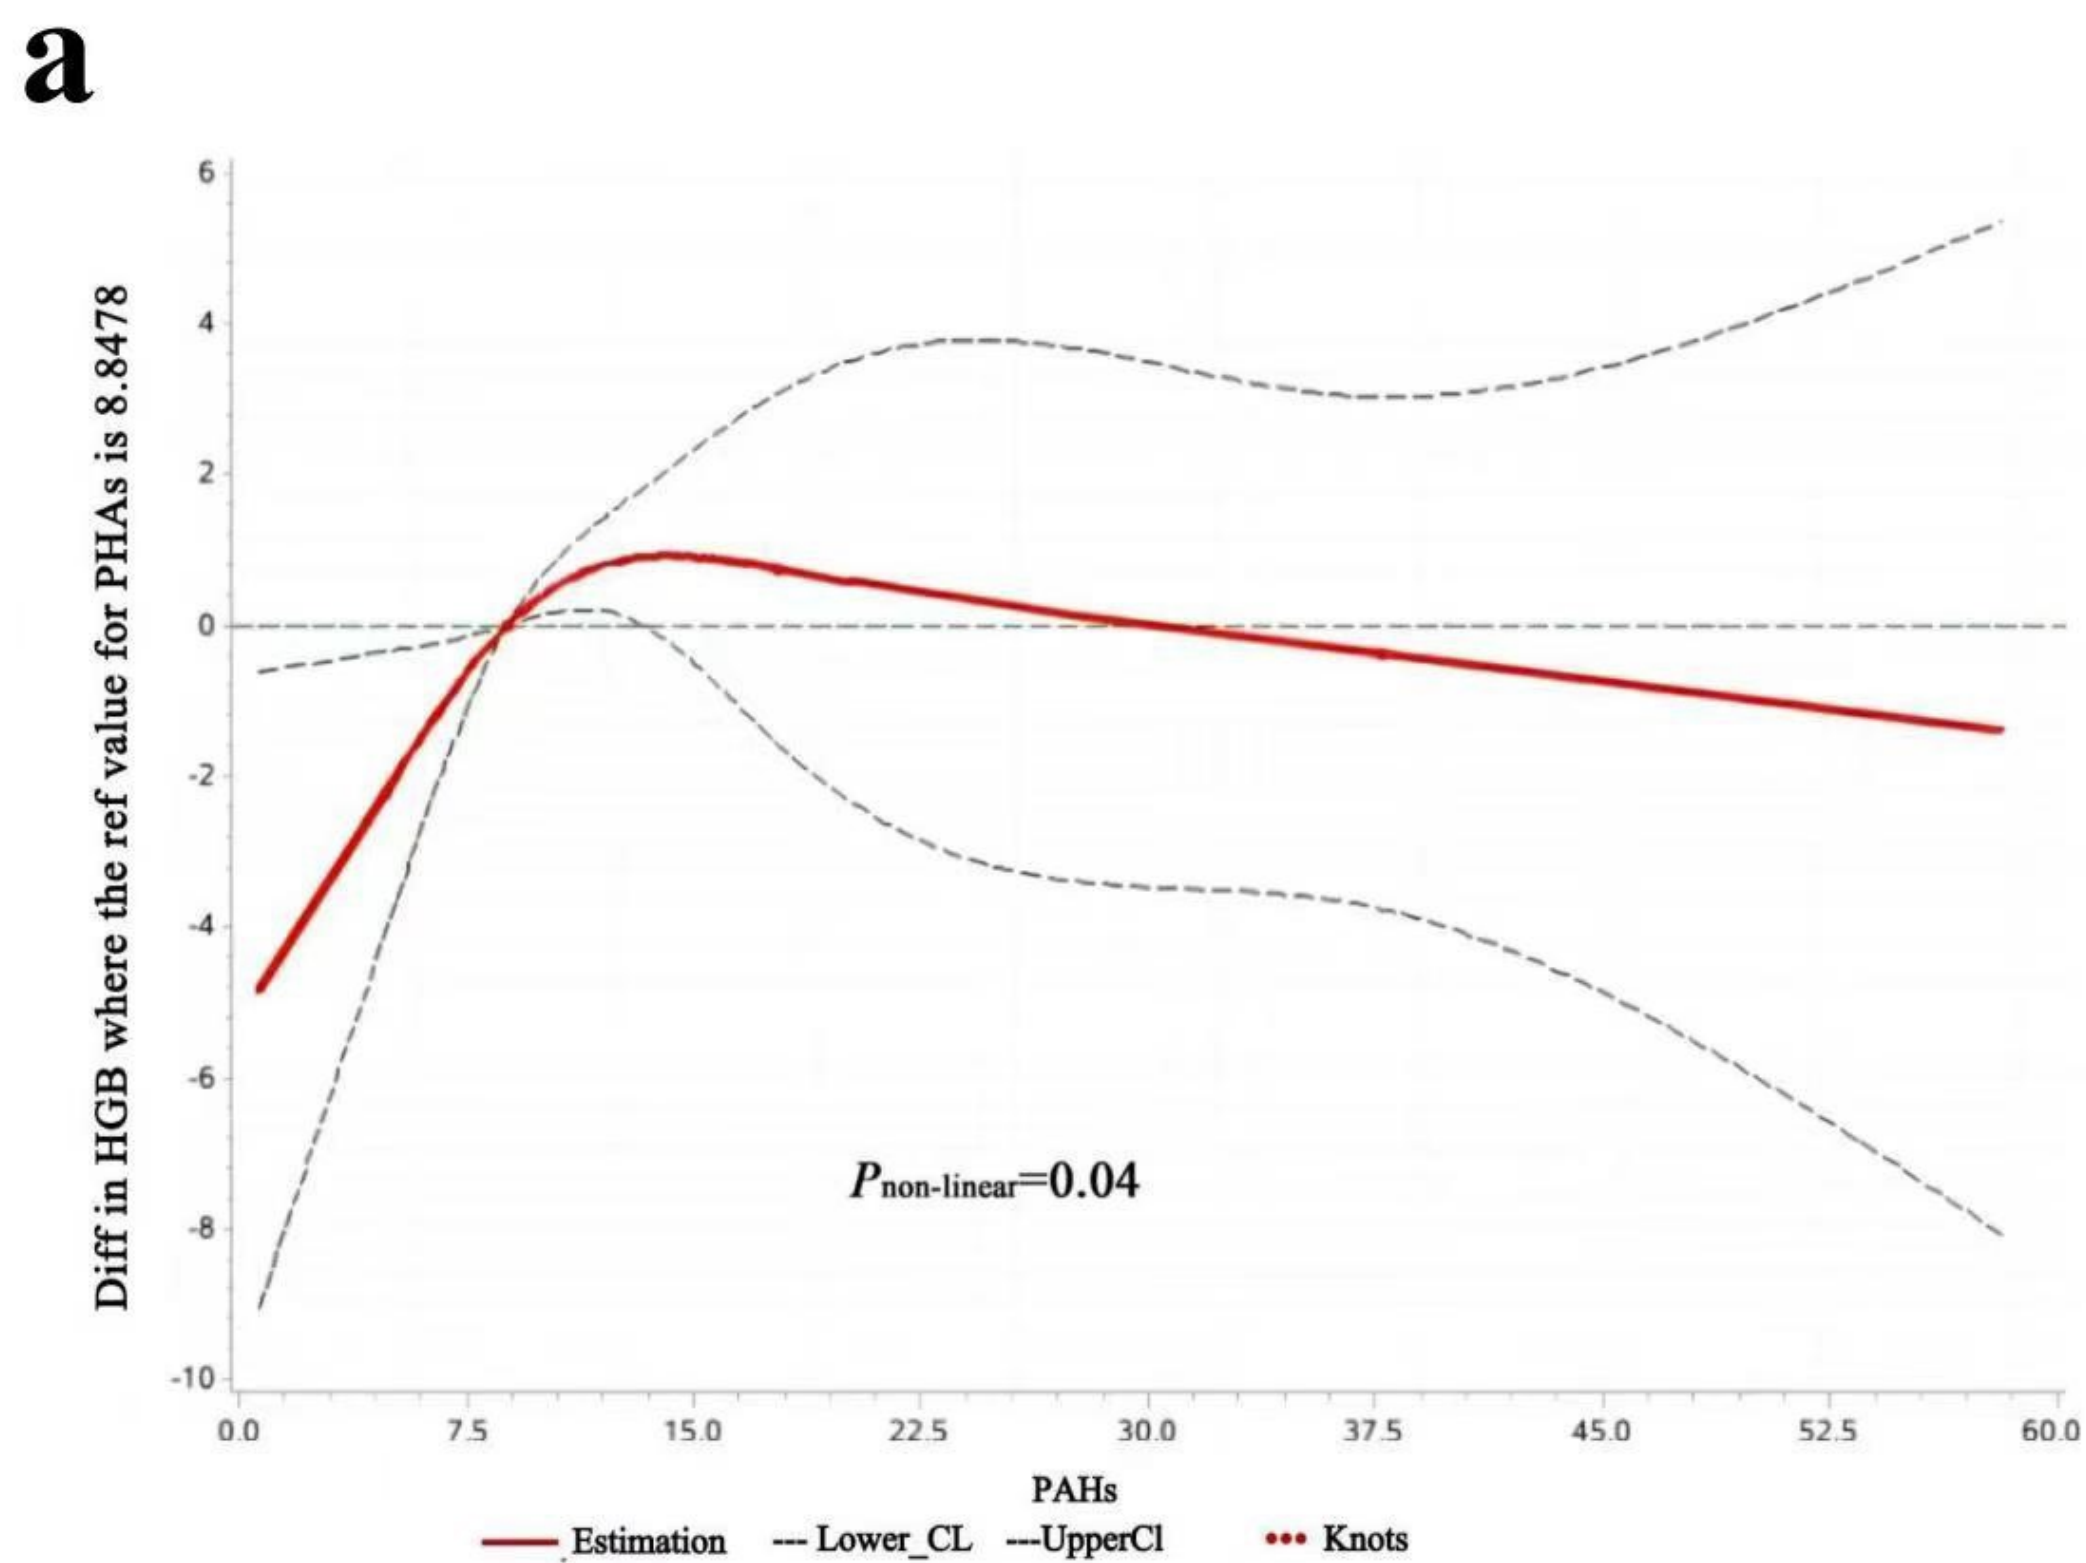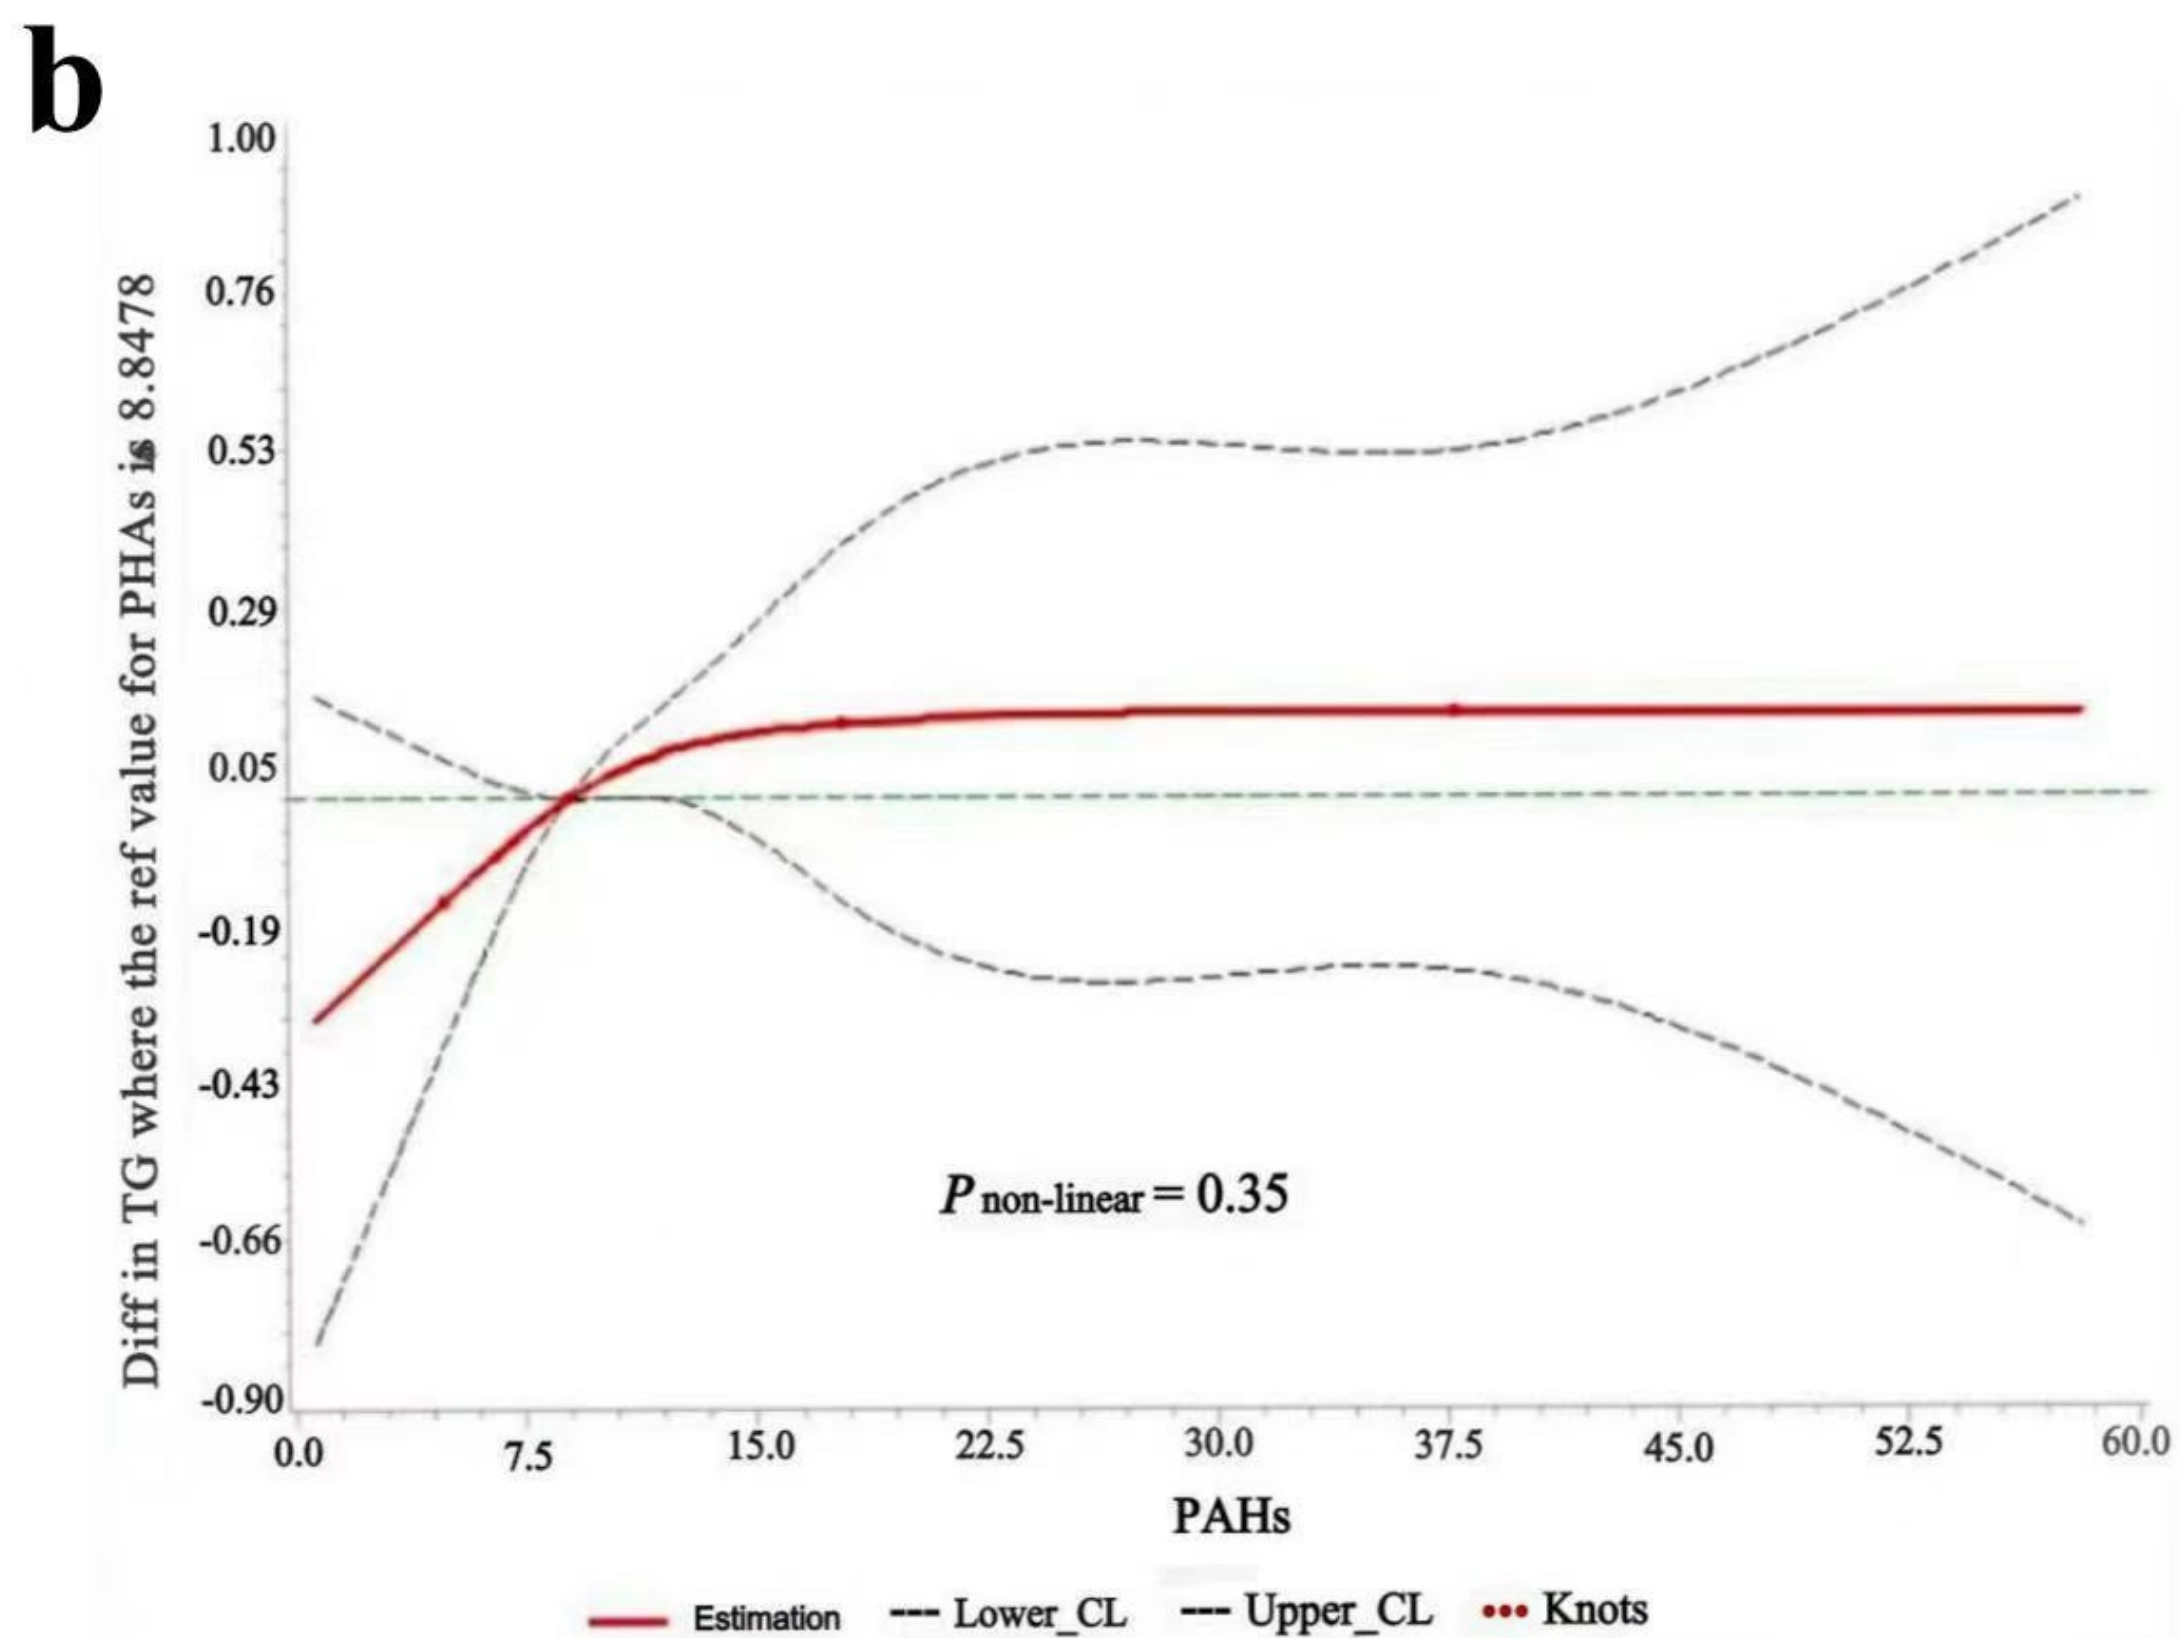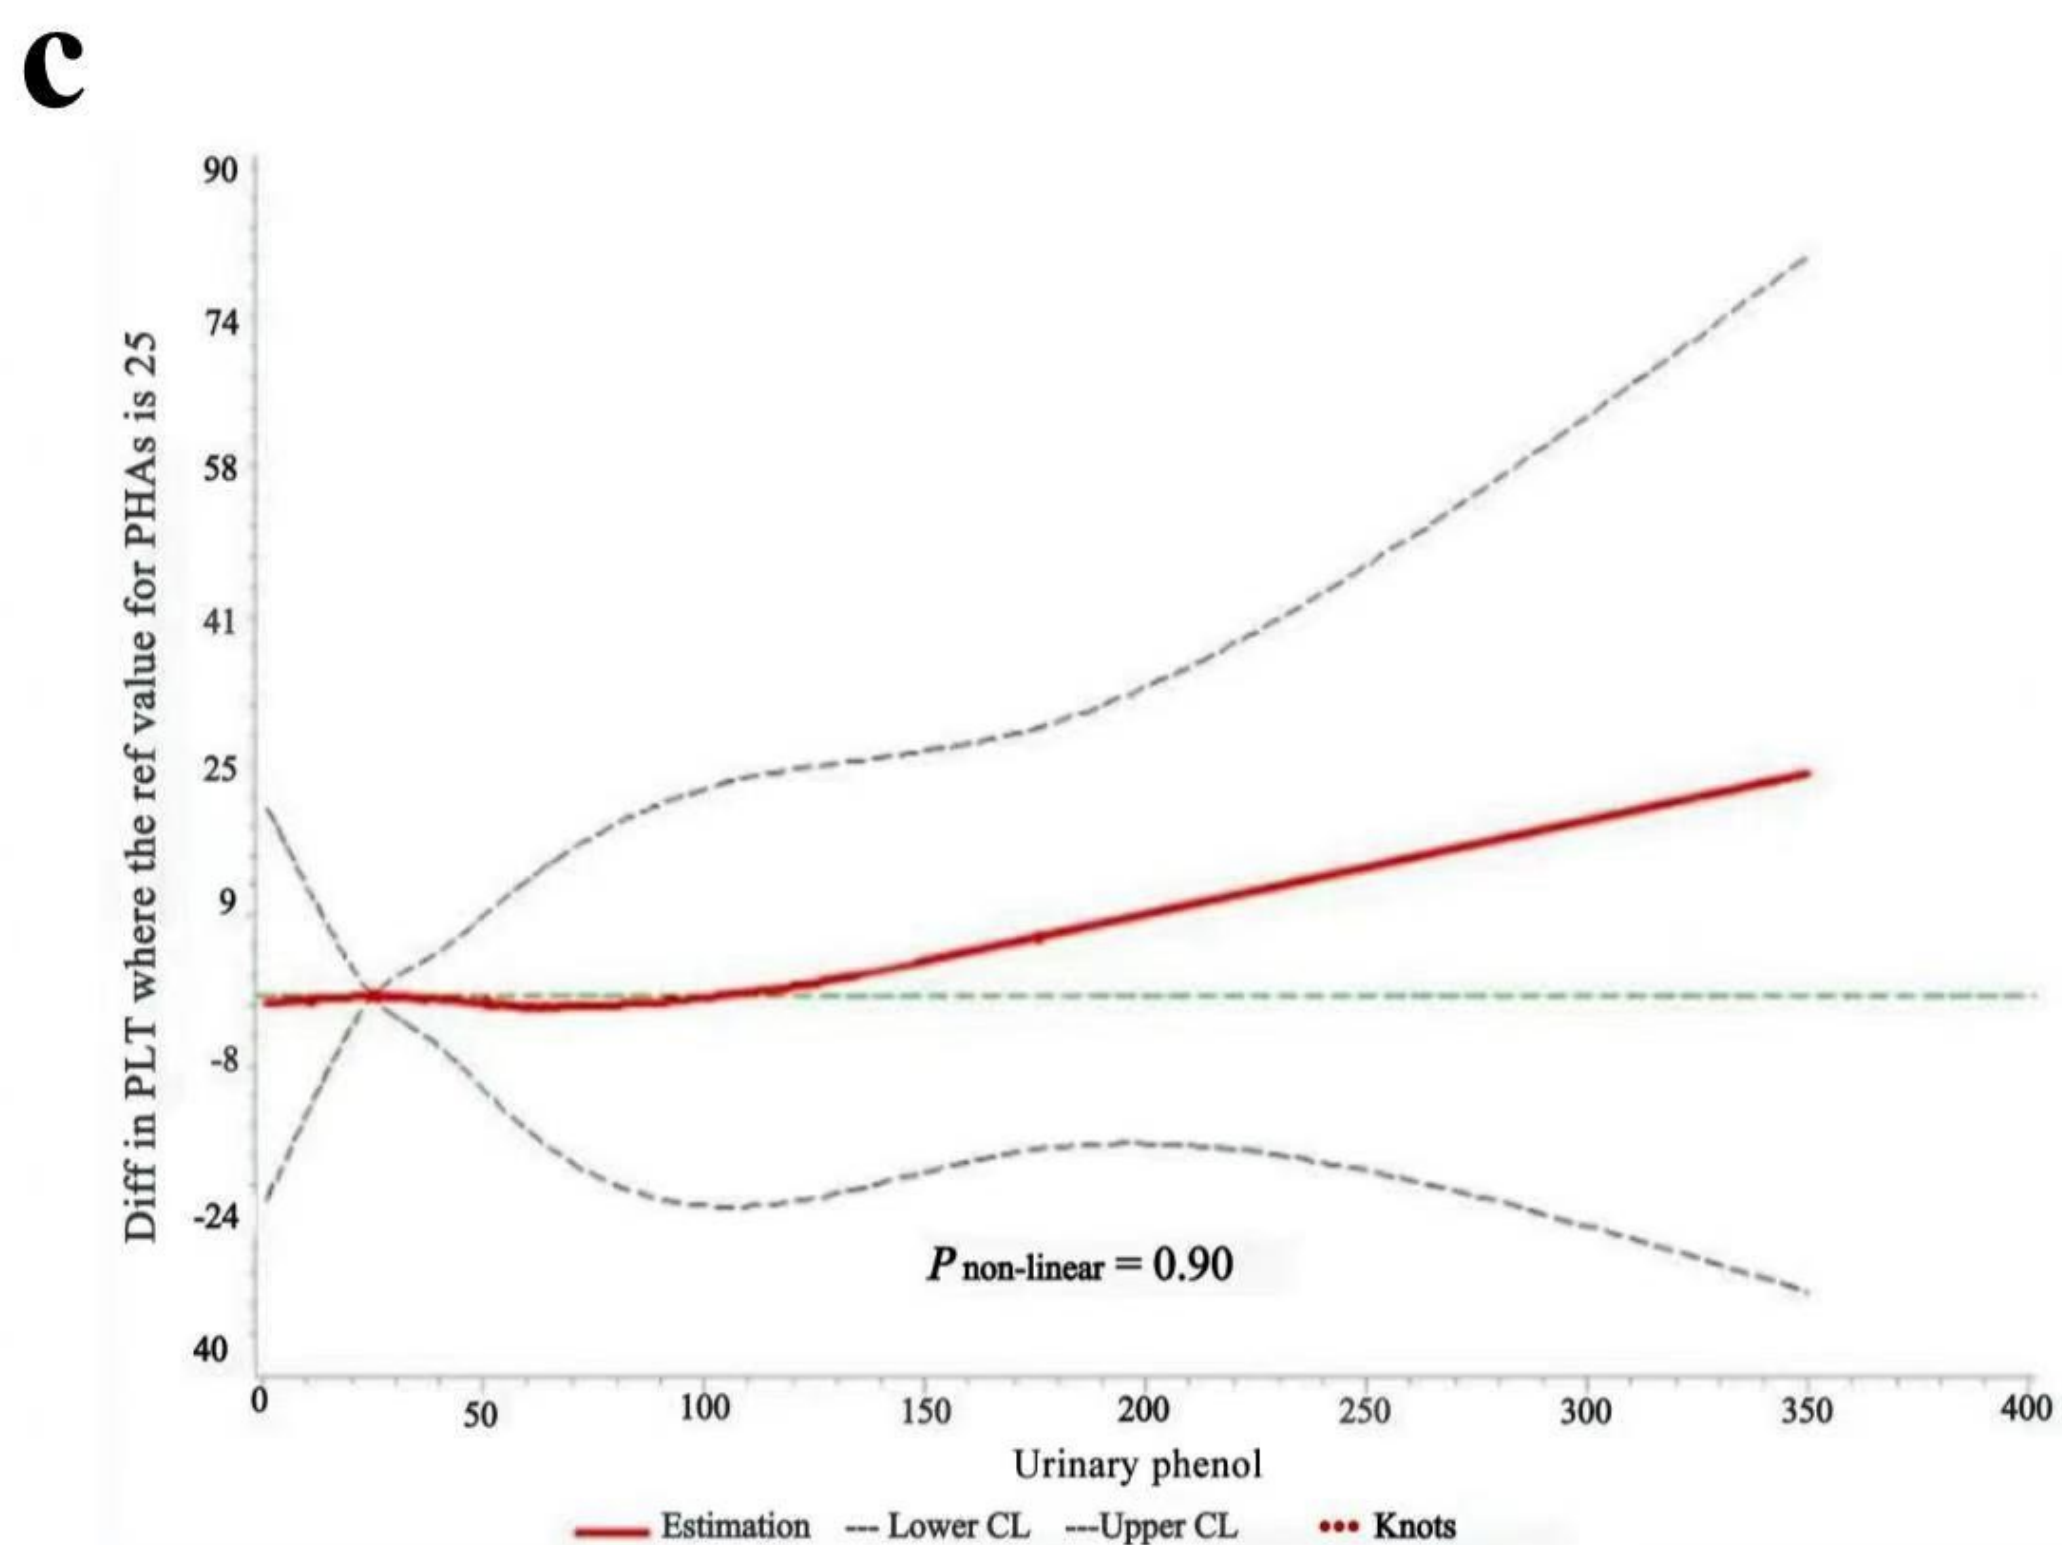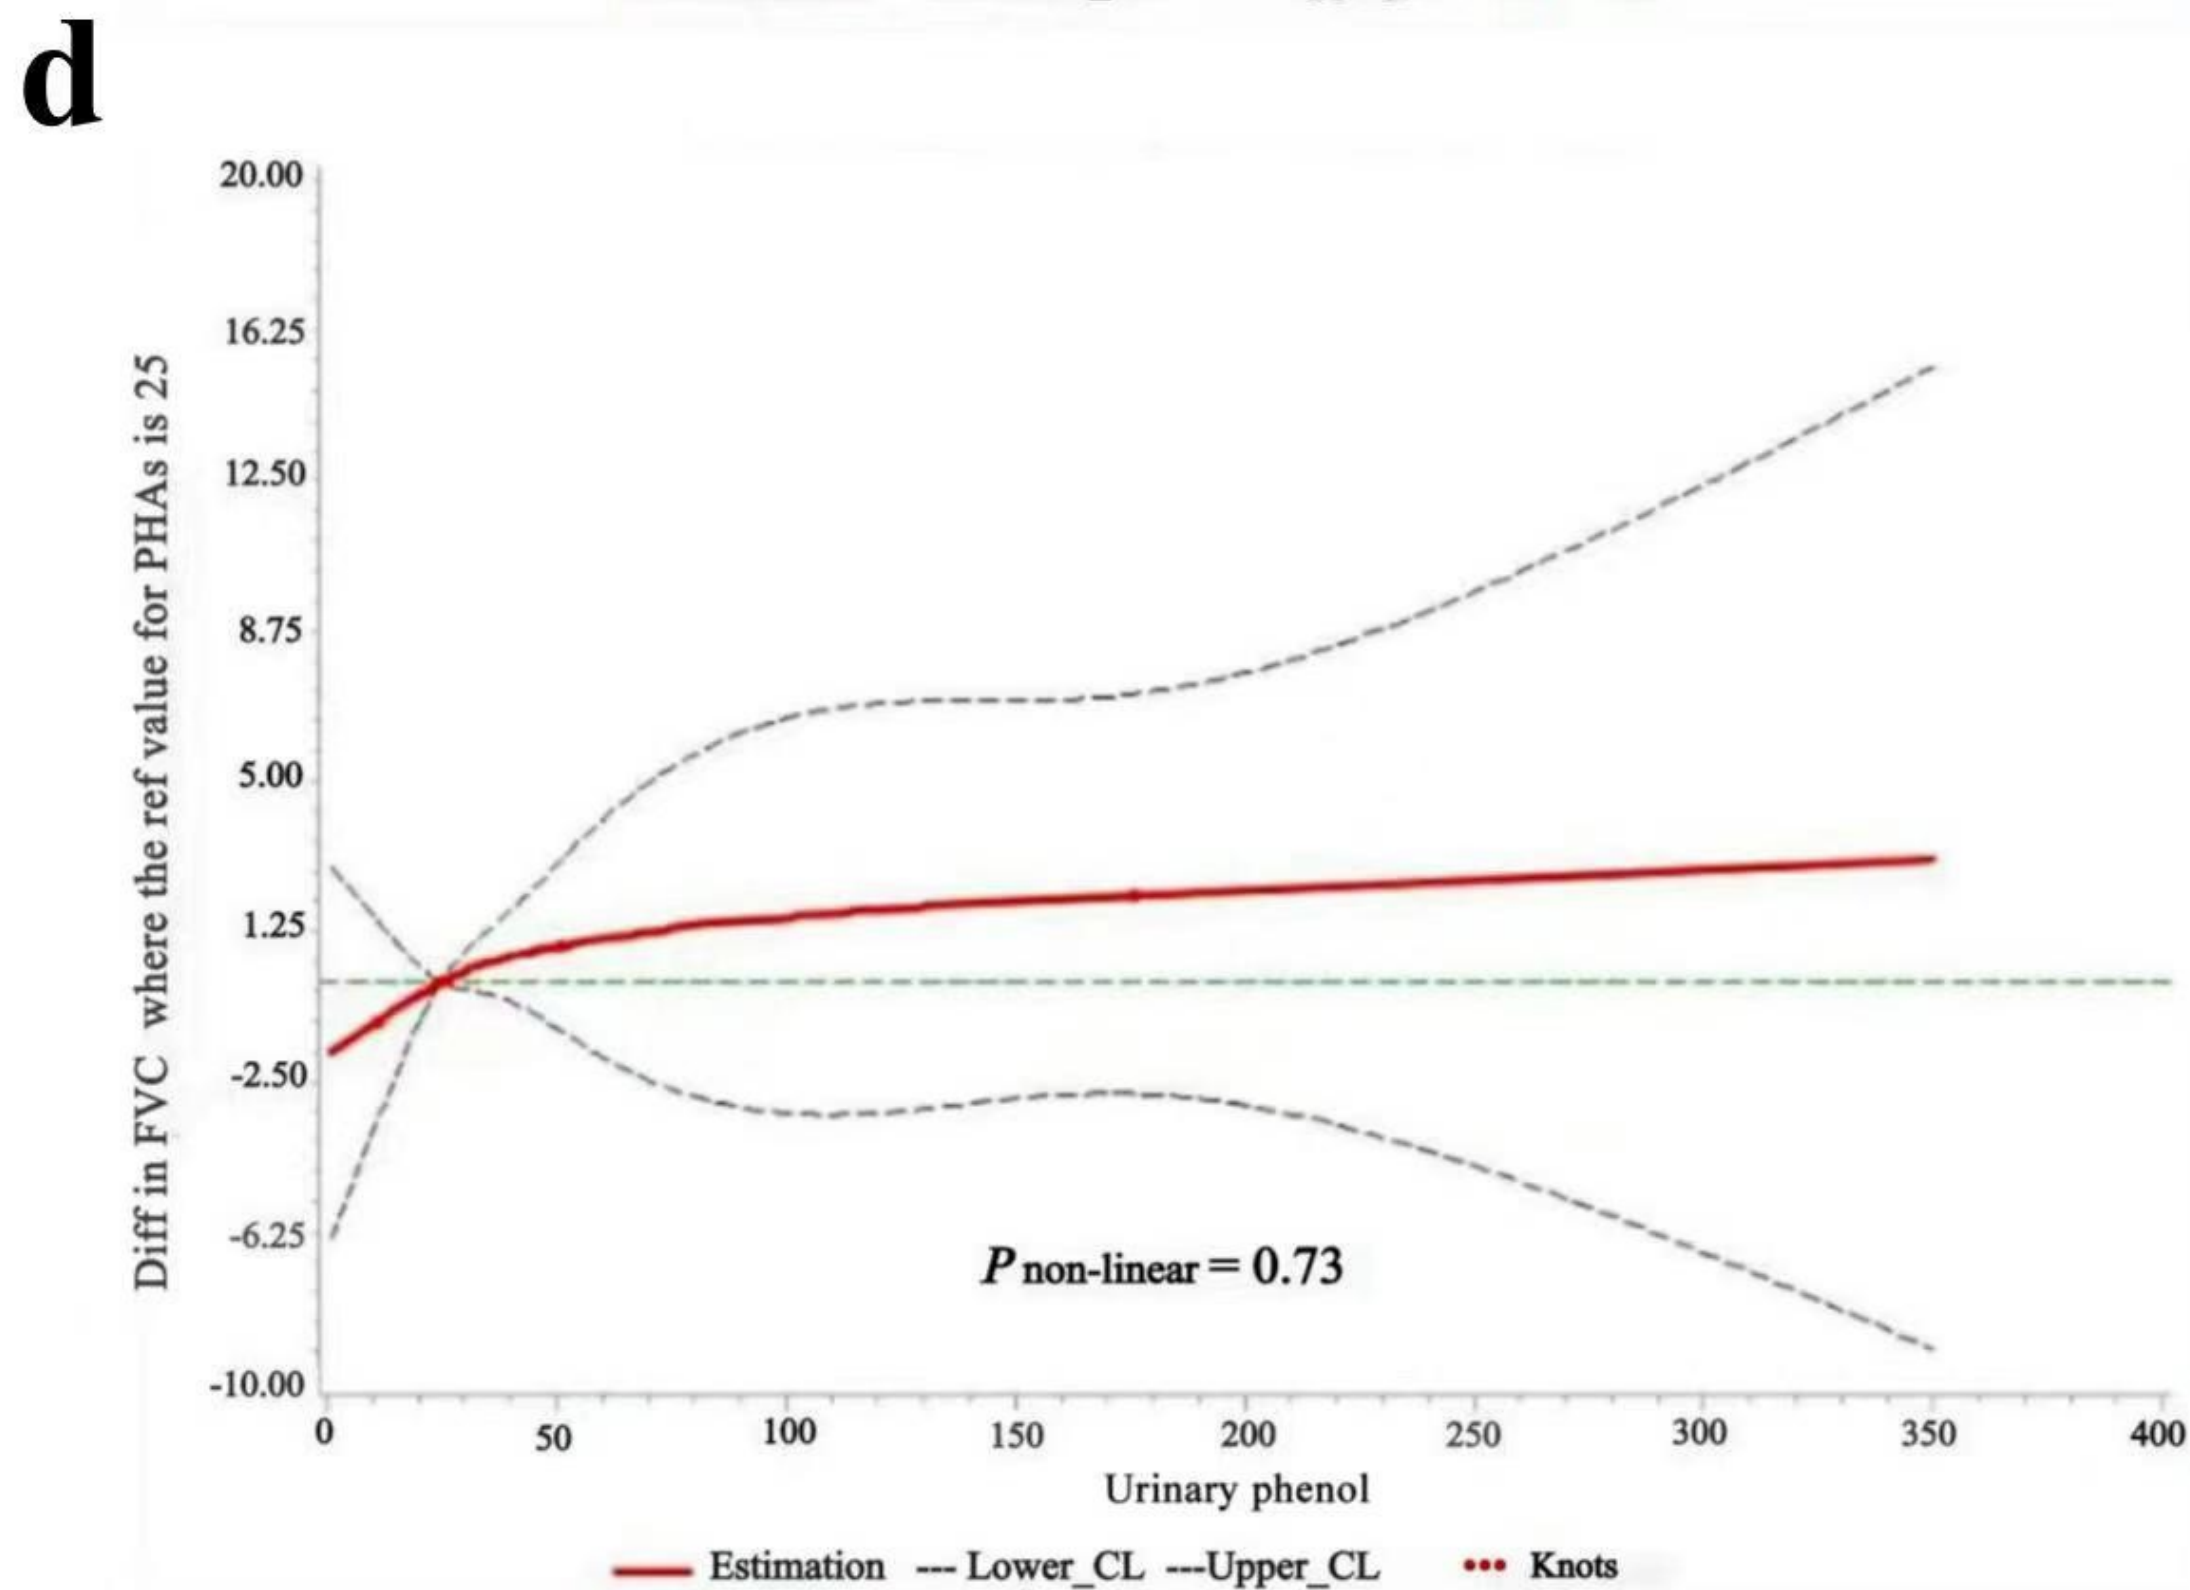

Supplement: d4em00306c2.pdf [file d4em00306c2.pdf]
